# Supplementary material
Source: PubMed Central journal article supplement (PMC9533185)
Supplement: jama-e2216844-s001.pdf [file jama-e2216844-s001.pdf]

1

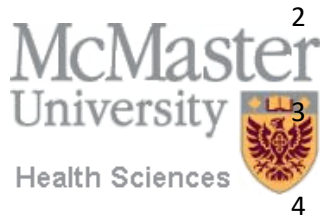

# NO PAIN

5

6

## Non-Opioid Prescriptions after Arthroscopic Surgery in Canada (NO PAIN): A Randomized Controlled Trial

7

8

9

### Principal Investigator (Supervisor):

Dr. Olufemi Ayeni

10

11

12

### Principal Investigator:

Dr. Nolan Horner

13

14

15

### Co-Principal Investigators:

Dr. Aaron Gazendam

16

17

18

19

Dr. Seper Ekhtiari

20

21

## NO PAIN PROTOCOL

Version: 2.0

22

23

24

25

26

27

28

29

The NO PAIN trial protocol is the confidential intellectual property of the NO PAIN Principal Investigators and McMaster University and cannot be used in any form without the expressed permission of the Principal Investigators.

30

31

32 **SIGNATURE PAGE**

33

| <b>Reviewed and Approved by:</b>                             |                   |              |
|--------------------------------------------------------------|-------------------|--------------|
| Dr. Olufemi Ayeni<br>(Principal Investigator,<br>Supervisor) | <b>Signature:</b> | <b>Date:</b> |
| Dr. Nolan Horner<br>(Principal Investigator)                 | <b>Signature:</b> | <b>Date:</b> |
| Dr. Aaron Gazendam<br>(Co-Principal Investigator)            | <b>Signature:</b> | <b>Date:</b> |
| Dr. Seper Ekhtiari<br>(Co-Principal Investigator)            | <b>Signature:</b> | <b>Date:</b> |

34

35 **TABLE OF CONTENTS**

36

37 **SIGNATURE PAGE..... 2**

38 **TABLE OF CONTENTS ..... 3**

39 **LIST OF ABBREVIATIONS ..... 4**

40 **STUDY SUMMARY ..... 5**

41 **1.0 BACKGROUND ..... 6**

42 **2.0 STUDY OBJECTIVES..... 7**

43     2.1 Primary Objective ..... 7

44     2.2 Secondary Objectives..... 7

45 **3.0 STUDY DESIGN..... 7**

46     3.1 Eligibility Criteria ..... 7

47     3.2 Patient Screening and Enrolment..... 8

48     3.3 Randomization Methods ..... 8

49     3.4 Description of Treatment Arms ..... 8

50     3.5 Outcomes ..... 9

51     3.6 Follow-Up ..... 11

52     3.7 Blinding..... 11

53 **4.0 STATISTICAL PLAN..... 11**

54     4.1 Sample Size..... 11

55     4.2 Statistical Analysis..... 11

56 **5.0 DATA MANAGEMENT ..... 12**

57     5.1 Case Report Forms and Data Entry..... 12

58     5.2 Data Transmissions ..... 12

59     5.3 Data Discrepancy Inquiries ..... 12

60     5.4 Security and Back-Up of Data ..... 12

61 **6.0 ETHICS AND DISSEMINATION ..... 13**

62     6.1 Research Ethics Approval..... 13

63     6.2 Consent ..... 13

64     6.3 Confidentiality ..... 14

65     6.4 Access to Data..... 14

66     6.5 Protocol Amendments..... 14

67     6.6 Adverse Event Reporting and Definitions ..... 14

68     6.7 Safety Monitoring ..... 15

69     6.8 Ethical Considerations ..... 16

70 **7.0 STUDY TEAM AND MANAGEMENT ..... 16**

71     7.1 Study Committees ..... 16

72 **8.0 REFERENCES..... 17**

73 Appendix 1: Telephone Script and Message for Sending Consent Form ..... 19

74 Appendix 2: Patient Education Infographic..... 20

75 Appendix 3: Members of the NO PAin Multi-Disciplinary Steering Committee ..... 21

76

77

|     |                              |                                                                  |
|-----|------------------------------|------------------------------------------------------------------|
| 78  | <b>LIST OF ABBREVIATIONS</b> |                                                                  |
| 79  |                              |                                                                  |
| 80  | ACI                          | Autologous Chondrocyte Implantation                              |
| 81  | ACL                          | Anterior Cruciate Ligament                                       |
| 82  | AE                           | Adverse Event                                                    |
| 83  | CI                           | Confidence Interval                                              |
| 84  | CRF                          | Case Report Form                                                 |
| 85  | EDC                          | Electronic Data Capture                                          |
| 86  | HCAHPS                       | Hospital Consumer Assessment of Health Care Provider and Systems |
| 87  | HGH                          | Hamilton General Hospital                                        |
| 88  | HiREB                        | Hamilton Integrated Research Ethics Board                        |
| 89  | LET                          | Lateral Extra-articular Tenodesis                                |
| 90  | LPI                          | Local Principal Investigator                                     |
| 91  | MacSports                    | McMaster Sports Medicine Research Group                          |
| 92  | MD                           | Mean Difference                                                  |
| 93  | MPFL                         | Medial Patellofemoral Ligament                                   |
| 94  | MUMC                         | McMaster University Medical Centre                               |
| 95  | NSAIDs                       | Non-steroidal Anti-inflammatories                                |
| 96  | ODB                          | Ontario Disability Benefit                                       |
| 97  | OMEs                         | Oral Morphine Equivalents                                        |
| 98  | OW                           | Ontario Works                                                    |
| 99  | PHI                          | Personal Health Information                                      |
| 100 | RCT                          | Randomized Controlled Trial                                      |
| 101 | SAE                          | Serious Adverse Event                                            |
| 102 | SD                           | Standard Deviation                                               |
| 103 | SLAP                         | Superior Labrum Anterior and Posterior                           |
| 104 | SJH                          | St. Joseph's Healthcare, Hamilton                                |
| 105 | TTO                          | Tibial Tubercle Osteotomy                                        |
| 106 | VAS                          | Visual Analogue Scale                                            |
| 107 | WSIB                         | Work Safety Insurance Board                                      |
| 108 |                              |                                                                  |
| 109 |                              |                                                                  |
| 110 |                              |                                                                  |

111

**STUDY SUMMARY**

|                                              |                                                                                                                                                                                                                                                                                                                                                                                                                                                                                                                                                                                                                                    |
|----------------------------------------------|------------------------------------------------------------------------------------------------------------------------------------------------------------------------------------------------------------------------------------------------------------------------------------------------------------------------------------------------------------------------------------------------------------------------------------------------------------------------------------------------------------------------------------------------------------------------------------------------------------------------------------|
| <b>Title</b>                                 | <b>Non-Opioid Prescriptions after Arthroscopic Surgery in Canada: A Randomized Controlled Trial</b>                                                                                                                                                                                                                                                                                                                                                                                                                                                                                                                                |
| <b>Short Title</b>                           | NO PAin                                                                                                                                                                                                                                                                                                                                                                                                                                                                                                                                                                                                                            |
| <b>Methodology</b>                           | Randomized controlled trial                                                                                                                                                                                                                                                                                                                                                                                                                                                                                                                                                                                                        |
| <b>Clinical Sites</b>                        | Multicentre                                                                                                                                                                                                                                                                                                                                                                                                                                                                                                                                                                                                                        |
| <b>Primary Objective</b>                     | To determine, in adult patients aged 18 years and older undergoing outpatient knee or shoulder arthroscopy, whether a non-opioid analgesia approach to postoperative pain, compared to usual care, reduces oral morphine equivalents (OMEs) consumed up to 6 weeks postoperatively.                                                                                                                                                                                                                                                                                                                                                |
| <b>Secondary Objectives</b>                  | To determine, in adult patients aged 18 years and older undergoing outpatient knee or shoulder arthroscopy, the effect of a non-opioid analgesia approach to postoperative pain, compared to usual care up to 6 weeks on: <ol style="list-style-type: none"> <li>1. Patient-reported pain as measured by a Visual Analogue Scale (VAS)</li> <li>2. Quantity of OMEs prescribed</li> <li>3. Number of opioid refills</li> <li>4. Patient satisfaction as measured by a question modified from the Hospital Consumer Assessment of Health Care Provider and Systems (HCAHPS) questionnaire</li> <li>5. Adverse event rate</li> </ol> |
| <b>Sample Size</b>                           | 200 patients                                                                                                                                                                                                                                                                                                                                                                                                                                                                                                                                                                                                                       |
| <b>Diagnosis and Main Inclusion Criteria</b> | All adult patients (18+ years) undergoing outpatient knee or shoulder arthroscopy (including ligament reconstruction).                                                                                                                                                                                                                                                                                                                                                                                                                                                                                                             |
| <b>Length of Follow-Up</b>                   | 6 weeks postoperatively                                                                                                                                                                                                                                                                                                                                                                                                                                                                                                                                                                                                            |

112

113

114

115

**1.0 BACKGROUND**

116  
117 Canada has the second highest per-capita opioid use in the world<sup>1,2</sup>. The Government of Canada has  
118 declared that “Canada is facing an opioid crisis...the growing number of overdoses and deaths caused  
119 by opioids...is a public health emergency”<sup>3</sup>. The problem appears to be worsening: In 2018, there  
120 were 4,588 opioid-related deaths across Canada, representing a 52% increase compared to the 3,023  
121 deaths in 2016<sup>4</sup>. In the city of Hamilton, the rate of opioid-related deaths has doubled when compared  
122 to the national average<sup>5</sup>. Opioids, though effective for short-term pain relief, are high-risk medications  
123 for addiction, tolerance, withdrawal, and fatal overdose<sup>6</sup>.

124  
125 Orthopaedic surgeons prescribe more opioid medications than any other surgical specialty<sup>7,8</sup>. A recent  
126 database study across various surgical specialties found that 94% of patients undergoing elective  
127 surgery received opioid prescriptions at discharge, and that all orthopaedic surgery patients were well  
128 in excess of the recommended opioid prescription guidelines<sup>9</sup>. Furthermore, the vast majority of  
129 patients receiving prescription opioids after surgery report having unused narcotics<sup>10</sup>. In other areas of  
130 the world, patients take far fewer opioids compared with North-American patients, but report similar  
131 satisfaction with pain management<sup>11,12</sup>. One randomized controlled trial (RCT) has shown non-  
132 inferiority in patient satisfaction with pain control after fracture fixation treated with acetaminophen  
133 alone as compared to acetaminophen and Tramadol<sup>13</sup>. A recent non-randomized prospective study  
134 demonstrated that the majority of patients undergoing knee arthroscopy had high rates of satisfaction  
135 in managing postoperative pain with only non-steroidal anti-inflammatories (NSAIDs) and  
136 acetaminophen prescribed postoperatively<sup>14</sup>.

137  
138 Knee and shoulder arthroscopy are the most commonly performed orthopaedic surgery procedures<sup>15</sup>.  
139 Despite this, there are no clinical practice guidelines for postoperative prescriptions. Locally, it is  
140 routine practice to prescribe narcotic medications after arthroscopic surgery. We conducted a survey  
141 of the Arthroscopy Association of Canada in order to determine the extent of this issue across the  
142 country<sup>16</sup>. On average, surgeons reported that 88% of their patients receive a prescription for an  
143 opioid medication following knee or shoulder arthroscopy. Canadian surgeons were on average  
144 prescribing 156 mg of oral morphine equivalents (OMEs) to patients. This is two to five times as  
145 many OMEs as the median amount that patients actually use after knee arthroscopy (35-86  
146 OMEs)<sup>17,18</sup>. Only 66% of surgeons discussed the risks of opioids with their patients. On average,  
147 surgeons estimated that only about 12% of their patients requested more opioid medications than  
148 initially prescribed. 92% of respondents felt that opioid over-prescription was an issue in surgery as a  
149 whole, and 82% believed it was an issue in arthroscopy specifically. There was clear equipoise as to  
150 whether non-opioid medications would provide sufficient analgesia post-arthroscopy, with 45%  
151 believing they would and 55% believing they would not. Finally, 95% of respondents stated that if  
152 high-quality evidence were to support a protocol of limited opioid prescriptions, they would change  
153 practice accordingly<sup>16</sup>.

154  
155 Therefore, a study is needed to assess the effectiveness of a non-opioid approach to postoperative pain  
156 aimed at reducing overall opioid prescriptions while maintaining adequate postoperative pain control.  
157 Recently, a group in London, Ontario conducted a similar study on patients undergoing outpatient  
158 general surgical procedures<sup>19</sup>. In that study, the investigators utilized a multi-faceted protocol which  
159 included: 1) a standardized non-opioid prescription, 2) a standardized intra-operative protocol, and 3)  
160 patient education<sup>19</sup>. The investigators found that their intervention significantly ( $p<0.0001$ ) reduced  
161 the number of opioids prescribed by surgeons and the amount of opioids used by patients, while  
162 adequately treating postoperative pain.

163

164 **2.0 STUDY OBJECTIVES**165 **2.1 Primary Objective**

166 The primary objective is to determine, in adult patients aged 18 years and older undergoing outpatient  
 167 knee or shoulder arthroscopy, whether a non-opioid analgesia approach to postoperative pain,  
 168 compared to usual care, reduces oral morphine equivalents (OMEs) consumed up to 6 weeks  
 169 postoperatively.

170

171 **2.2. Secondary Objectives**

172 The secondary research objectives are to determine, in adult patients aged 18 years and older  
 173 undergoing outpatient knee or shoulder arthroscopy, the effect of a non-opioid analgesia approach to  
 174 postoperative pain, compared to usual care on patient-reported pain and satisfaction, quantity of OMEs  
 175 prescribed, number of opioid refills, and any adverse events up to 6 weeks postoperatively.

176

177 **3.0 STUDY DESIGN**

178 This is an RCT of 200 patients at or over the age of 18 undergoing outpatient knee or shoulder  
 179 arthroscopy. Patients will be evaluated clinically at 2 and 6 weeks postoperatively. Patients will be  
 180 recruited from experienced arthroscopic surgeons at 3 hospital sites in Hamilton, Ontario: McMaster  
 181 University Medical Centre (MUMC), St. Joseph's Healthcare (SJH), and the Hamilton General  
 182 Hospital (HGH). All research will be conducted according to international standards of Good Clinical  
 183 Practice and institutional research policies and procedures.

184

185 **3.1 Eligibility Criteria**186 **3.1.1 Inclusion Criteria**

187 1. Patients undergoing outpatient knee or shoulder arthroscopy for any of the following  
 188 procedures:

| <b>Knee</b>                                     | <b>Shoulder</b>                 | <b>Shoulder and Knee</b>      |
|-------------------------------------------------|---------------------------------|-------------------------------|
| ACL reconstruction (with or without LET)        | Subacromial decompression       | Diagnostic arthroscopy        |
| MPFL reconstruction ( <b>not</b> including TTO) | Rotator cuff repair             | Irrigation and/or debridement |
| Chondroplasty                                   | Shoulder stabilization          | Loose body removal            |
| Meniscectomy                                    | Superior capsule reconstruction | Synovectomy                   |
| Meniscal repair                                 | Biceps tenotomy/tenodesis       |                               |
| Meniscal transplant                             | Capsular release                |                               |
| Microfracture                                   | SLAP repair                     |                               |
| ACI                                             |                                 |                               |
| Fixation of unstable osteochondral lesion       |                                 |                               |

189

2. Patients ages 18 and older

190

3. Patients who have the ability to speak, understand, and read English

191

4. Provision of informed consent

192

193 **3.1.2 Exclusion Criteria**

194 1. Patients who take or are on a home dose of an opioid medication (i.e. once daily or more)

195

2. Patients involved in ongoing litigation or compensation claims for any injury (e.g. Work Safety Insurance Board, WSIB)

196

3. Patients involved in another research study that requires a specific post-operative pain control medication regimen

197

198

- 199 4. Patients undergoing a knee or shoulder arthroscopy procedure that will likely have an operative  
200 time greater than 3 hours
- 201 5. Patients who will undergo concomitant open surgery
- 202 6. Patients who require overnight admission
- 203 7. Patients with a contraindication or allergy to NSAIDs, acetaminophen, or morphine and  
204 hydromorphone
- 205 8. Patients diagnosed with renal disease or cardiac disease
- 206 9. Patients who are scheduled for/plan to have an additional surgical procedure during the 6-week  
207 follow-up period
- 208 10. Patients who will likely have problems, in the judgement of the investigator, with maintaining  
209 follow-up
- 210 11. Any other reason(s) the investigator feels is relevant for excluding the patient  
211

212 \*In the event that the patient does not meet the specific eligibility criteria postoperatively (e.g. patient  
213 required overnight admission unexpectedly), the patient will be withdrawn from the study (if  
214 discovered prior to the 6-week follow-up) and/or excluded from the final analysis (if discovered after  
215 the final 6-week follow-up).

### 216 217 **3.2 Patient Screening and Enrolment**

218 Patients ages of 18 and older who present to a recruiting hospital for a knee or shoulder injury will be  
219 screened prior to their arthroscopic procedure. To screen patients for eligibility, designated study  
220 personnel at each clinical site will be in close contact with the participating site investigators (surgeons)  
221 and their administrative staff to help identify which patients are scheduled for a knee or shoulder  
222 arthroscopic procedure each month. The surgeon, clinic staff, or administrator staff will ask the potentially  
223 eligible patient if they are comfortable being approached about a clinical research study either during a  
224 preoperative clinic visit, via a phone call, or email. If the patient agrees, study personnel will contact the  
225 patient either in person OR via phone call at some point prior to surgery (**Appendix 1**). For all remote  
226 consent calls, the study personnel will email the patient the consent form (in Word or PDF format) at the  
227 beginning of, or prior to the call. The patient will be informed that they are able to abstain from deciding  
228 until the date of the procedure. The study personnel will screen the patient for eligibility by going through  
229 all items listed on the Screening Form and if eligible, proceed with going through the informed consent  
230 form and obtaining informed consent from the patient. If the patient agrees to participate, they will be  
231 asked to sign/initial the consent form where indicated. For a remote consent call, patients will be instructed  
232 to send a signed scanned copy to the study personnel via email or will be provided a paper consent form to  
233 complete prior to their surgery. Refer to **Section 6.2** for more information regarding the consent process.  
234 All screened patients will be classified as included, excluded, or missed (eligible, but not randomized  
235 due to error).

### 236 237 **3.3 Randomization Methods**

238 Eligible patients will be randomized using the centralized 24-hour computerized randomization system  
239 on REDCap™ Cloud, that allows for automated internet based randomization to allocate patients to the  
240 control (standard of care) or intervention (non-opioid prescription and infographic) group. Patients  
241 should be randomized as close as possible to the time of surgery as permitted by site-specific operating  
242 room scheduling.

### 243 244 **3.4 Description of the Treatment Arms**

#### 245 3.4.1 Intervention Group: Non-Opioid Prescription and Infographic

246 The study intervention will involve 3 components:



- 247 1) **A standardized non-opioid prescription:** A prescription for Naproxen 500mg PO BID PRN x  
248 60 tabs, Acetaminophen 1000mg PO Q6H PRN x 100 500mg tabs and Pantoprazole 20mg PO  
249 daily x 30 tabs (to be taken only while utilizing Naproxen). The inclusion of two over-the-  
250 counter analgesic medications provided on the prescription accomplishes two goals: a) it  
251 legitimizes these medications and suggests that the healthcare providers truly believe in and  
252 recommend their use, and b) it allows for patients on Ontario Disability Benefit (ODB) or  
253 Ontario Works (OW) access to medications that may otherwise be cost-prohibitive. In the case  
254 of a Naproxen intolerance, a prescription for Meloxicam 15mg PO BID PRN x 60 tabs will be  
255 given.
- 256 2) **A limited opioid “rescue prescription”:** A prescription of Hydromorphone 1mg PO Q4H PRN  
257 x 10 tabs will be included on a separate prescription. In cases of Hydromorphone intolerance, a  
258 prescription for Morphine 5mg PO Q4H PRN x 10 tabs will be provided. Patients will be  
259 instructed to use the opioid prescription only in cases where they are unable to achieve adequate  
260 pain control using the non-opioid prescription. In the case of a severe hydromorphone allergy,  
261 patients will receive Oxycodone 5mg PO Q4H PRN x 10 tabs. Included with the opioid  
262 prescription will be a prescription for Senna 1-2 tabs QHS PRN for constipation.
- 263 3) **Patient education infographic:** The infographic will contain information on how to take the  
264 prescribed medications, along with instructions that the morphine rescue prescription should  
265 only be used in cases where the non-opioid pain medications are not providing satisfactory pain  
266 control. The infographic will also contain information about the risks of opioids and prevalence  
267 of opioid misuse and abuse. Finally, it will include information on appropriate storage and  
268 disposal of opioids (**Appendix 2**).

269  
270 Patients in the intervention group were prescribed all medications on an as needed basis based on  
271 pain levels but were encouraged to utilize both naproxen and acetaminophen even when  
272 experiencing mild pain in the first week following surgery. The naproxen dosing was higher than  
273 the recommended starting dose in Canada. After consultation with a perioperative pharmacist as  
274 well as a review of the existing literature, 500mg BID was chosen to provide optimal analgesia in  
275 the postoperative setting.

#### 276 277 3.4.2 Control Group: Standard of Care

278 The control group is standard of care, which typically includes a prescription for an opioid. The  
279 standard of care prescription varied by surgeon and procedure and included oxycodone, codeine or  
280 hydromorphone, ranged from 20 tablets to 80 tablets and were prescribed to be taken on an as needed  
281 basis. Patients in the standard of care group did not receive standardized counselling surrounding the  
282 use of NSAIDs or acetaminophen for minor or moderate postoperative pain and these medications were  
283 not routinely prescribed postoperative in this group. Patients were allowed to use these over-the-  
284 counter medications at their own discretion.

#### 285 286 3.4.3 Standardization of Allocating the Control and Intervention

287 Prior to starting the study, each surgeon investigator will provide the study team with their standard of  
288 care prescriptions for each procedure they perform as part of their practice (as per the procedures listed  
289 in **Section 3.1.1**, inclusion criterion 1). The non-opioid intervention prescription and infographic will  
290 also be prepared prior to starting the study. This way, the allocated prescription can be placed on the  
291 patient’s chart prior to surgery by the study team to avoid the potential for surgeon error. The  
292 surgeon/resident will simply need to review and sign the prescription before it is given to the patient.

293

294 In addition to reducing the potential for prescription error, these methods eliminate the risk of surgeons  
295 modifying their practice to prescribe less opioids part way through the study if they feel the  
296 intervention group is effective as surgeons will be unable to be blinded to the patient’s allocation group  
297 (Note: A Medical Monitor will be independently and objectively monitoring for safety based on a  
298 regular blinded review of the data. See **Section 6.7**). The decision to add additional deep vein  
299 thrombosis prophylaxis to the patient prescription is left to the discretion of the treating surgeon on a  
300 case by case basis in both the control and intervention groups.

301

#### 302 3.4.4 Standardization of Peri-Operative Pain Management

303 All patients will receive a standardized peri-operative pain management protocol, which will include:  
304 a) acetaminophen 1000mg PO q6h PRN, b) ketorolac (15-30mg IV x 1), c) ondansetron (4-8mg PO/IV  
305 q8h PRN), d) gravol (25-50mg PO/IV q6h PRN), e) an extra-articular injection of 10mL of 0.5%  
306 bupivacaine with epinephrine into the soft tissues surrounding the portal sites, f) Oxycodone 5mg  
307 regular release PO x 1 in recovery, and g) hydromorphone 1mg PO q4h PRN (or Morphine or  
308 Oxycodone if intolerant/allergic, see 3.4.1 for details). Note that dose ranges are provided to allow for  
309 adjustments based on patient weight if necessary.

310

### 311 **3.5 Outcomes**

#### 312 3.5.1 Primary Outcome

313 The primary outcome is the number of total OMEs consumed at 6 weeks postoperatively, as  
314 determined by a patient-reported medication diary.

315

#### 316 3.5.2 Secondary Outcomes

317 Secondary outcomes include: 1) patient-reported pain (VAS), 2) patient-reported satisfaction with pain  
318 control (HCAHPS), 3) number of OMEs prescribed, 4) number of opioid refills, and 5) any adverse  
319 events up to 6 weeks postoperatively.

320

#### 321 3.5.3 Outcome Measures

322 Patients will be provided with a medication and pain diary to complete (as a Word document to update  
323 on the computer or on paper) daily from the time of surgery to the 2-week follow-up visit. The research  
324 personnel will check the medication and pain diary at the 2-week visit and update the case report forms  
325 (CRFs) with any and all information. The medication and pain diary will be used to measure the  
326 number of OMEs consumed (primary outcome), the number of OMEs prescribed and refills (secondary  
327 outcomes), and daily pain VAS scores (secondary outcome). At the 6-week follow-up patients will also  
328 be asked the total amount of opioid medication they have taken.

329

330 Patients will complete self or interview-administered outcome questionnaires during the routine follow-  
331 up visits at 2 weeks and 6 weeks. The VAS will include a 100mm line, on which patients will be asked  
332 to rate their average pain since their surgery. Higher scores indicate higher levels of pain. The VAS is  
333 one of the most frequently used pain rating scales in clinical practice and research<sup>21</sup>. The VAS is a  
334 validated unidimensional scale that is easy to use, requires no verbal or reading skills, and is  
335 sufficiently versatile to be employed in a variety of settings<sup>22-24</sup>. The HCAHPS is a validated and  
336 nationally standardized survey designed to evaluate patient perspectives of hospital care<sup>25</sup>. As per  
337 previous research evaluating patient satisfaction following orthopaedic procedures, we used the  
338 following modified question from the HCAHPS questionnaire related to satisfaction with pain relief,  
339 answered on a Likert scale (never, sometimes, usually, or always): “In the time after surgery, how often  
340 was your pain well controlled?”<sup>14,26</sup>. For a dichotomous analysis, responses of “always” and “usually”  
341 will be grouped as satisfied patients, and responses of “sometimes” or “never” will be grouped as

342 unsatisfied patients. Patient satisfaction will be measured at the 2- and 6-weeks follow-up  
 343 appointments. Adverse events, defined as any symptom, sign, illness, or experience that develops or  
 344 worsens in severity during the course of this study, will also be documented (**Table 1**).  
 345

346

**Table 1: Schedule of events**

| Data Collection                             | Enrollment | 2 Weeks | 6 Weeks |
|---------------------------------------------|------------|---------|---------|
| Screening and Informed Consent              | ●          |         |         |
| Enrolment Data (Demographics)               | ●          |         |         |
| Follow-Up Form                              |            | ●       | ●       |
| Medication Diary                            |            |         |         |
| OMEs consumed                               |            | #       |         |
| OMEs prescribed                             |            |         |         |
| Opioid refills                              |            |         |         |
| Total OMEs consumed                         |            |         | ●       |
| Visual Analogue Scale (VAS)                 |            | #       | ●       |
| Patient Satisfaction (Question from HCAHPS) |            | ●       | ●       |
| Adverse Events                              |            | x       | x       |

347  
 348

*x – if applicable, # - daily up to the 2-week visit*

349

### 3.6 Follow-Up

350 Study participants will be followed at 2 weeks (window between 1 and 3 weeks) and 6 weeks (window  
 351 between 5 and 7 weeks) postoperatively. Visits that occur outside of these windows must be marked as  
 352 early or late, respectively. This follow-up schedule is in accordance with the current practice at each  
 353 clinical site and does not require extra visits or costs to the patients. Patients who are unable to attend  
 354 the follow-up appointments will be contacted by telephone to complete the applicable questionnaires  
 355 and CRFs for all visits up to and including 6 weeks.  
 356

357

### 3.7 Blinding

358 Given that patients in the intervention group will receive a pamphlet explaining how to use their  
 359 prescription allocation, patient blinding is not feasible. Surgeons cannot be blinded as they will need to  
 360 sign the prescriptions and provide any necessary advice about the medications being prescribed.  
 361 Outcome assessors and data analysts will be blinded.  
 362

363

## 4.0 STATISTICAL PLAN

364

### 4.1 Sample Size

365 Based on prior literature, patients undergoing knee and shoulder arthroscopy can be expected to  
 366 consume a median of about 100 OMEs post-surgery without intervention<sup>18</sup>. Given that we are  
 367 prescribing 75 OMEs in the intervention group, and patients have been shown to consume 25-50% of  
 368 their prescription depending on whether they are undergoing knee or shoulder arthroscopy,  
 369 respectively, we expect that the overall prescription consumption will be 33% of the prescribed amount  
 370 (i.e. 25 OMEs). Using an alpha-value of 0.05, power of 80%, a standard deviation of 155 OMEs<sup>18</sup>, the  
 371 required sample size is 68 patients per group, for a total sample size of 136. According to Thoma *et al.*,  
 372 estimated sample sizes should be increased by 10-40% to allow for loss to follow-up and unforeseen  
 373 circumstances<sup>27</sup>. Thus, based on the most conservative estimate of this guidance, we will increase our  
 374 sample size by 40% for a total of 190 patients, rounded to 200 (100 per group). Allowing for patients  
 375 who need to be excluded, those who choose not to participate, and loss to follow-up, we estimate we  
 376 will need to screen approximately 300 patients for eligibility for a 66% inclusion rate. Based on  
 377 previous caseloads (1300 knee and shoulder arthroscopy cases per year in total in Hamilton), and

378 allowing for holidays and other variations (e.g. summer shutdown), we very conservatively estimate  
379 that this will require 6 months of screening and enrolment.

380

## 381 **4.2 Statistical Analysis**

382 We will adopt the intention to treat principle for all analyses—that is, patients will be retained in their  
383 randomized groups for all analyses. The baseline characteristics of the patients will be summarized by  
384 group, reported as a mean (standard deviation [SD]) or median (first quartile, third quartile) for  
385 continuous variables and count (percent) for categorical variables. We will use multiple imputation to  
386 handle missing data to enable an intention to treat analysis<sup>29</sup>. No interim analyses are planned. All tests  
387 will be 2-sided with  $\alpha = 0.01$ . We will use SAS 9.4 (Cary, NC) to perform all analyses.

388

### 389 4.2.1 Primary Analysis

390 The number of OMEs consumed will be compared between groups using an independent samples t-test  
391 and presented with a p-value as well as a mean difference (MD) with 95% confidence intervals (CIs).

392

### 393 4.2.2 Secondary Analyses

394 We will perform an independent samples t-tests to test for differences in 2-week VAS scores and  
395 OMEs prescribed between groups. We will also plot mean daily VAS scores as per the medication and  
396 pain diary over time up to 2 weeks as a descriptive analysis. The proportion of adverse events, satisfied  
397 patients, and opioid refills will be compared between groups using an odds ratio. Each secondary  
398 outcome will be quantified using descriptive statistics and 95% CIs.

399

### 400 4.2.3 Subgroup/Sensitivity Analyses

401 We plan to conduct 3 subgroup analyses comparing 1) shoulder versus knee arthroscopy patients; 2)  
402 patients who received a regional block of any kind as a part of their anesthetic versus those who did  
403 not; and 3) males versus females. We plan to perform a logistic regression and include treatment by  
404 subgroup interactions to assess whether the magnitude of the treatment effect is significantly different  
405 between these subgroups.

406

## 407 **5.0 DATA MANAGEMENT**

### 408 **5.1 Case Report Forms and Data Entry**

409 The CRFs will be the primary data collection tool for the study. All data requested on the CRF must be  
410 recorded. An Electronic Data Capture (EDC) system (REDCap™ Cloud) will be used to submit data  
411 to the Methods Centre located at McMaster University. Site personnel will receive a unique login and  
412 password for the REDCap Cloud system and will be able to view and modify data for participants  
413 recruited at their clinical site. Upon receipt of the data, the personnel at the Methods Centre will make a  
414 visual check of the data and they will query all missing data, implausible data, and inconsistencies.

415

### 416 **5.2 Data Transmissions**

417 Data will be transmitted from the clinical sites to the Methods Centre using the REDCap Cloud system.  
418 The data entry screens in the REDCap Cloud system will be similar to the paper CRFs. Data integrity  
419 will be enhanced by using the REDCap Cloud system through a variety of mechanisms for checking  
420 data at the time of entry including referential data rules, valid values, range checks, and consistency  
421 checks against data already stored in the database. Site personnel will be able to view and modify data  
422 for participants recruited from their clinical site only. Each time data is submitted or modified, it will  
423 be validated by Methods Centre personnel.

424

425 **5.3 Data Discrepancy Inquiries**

426 Once data are submitted, additional errors will be detected by the program within the EDC system to  
427 detect missing data or errors. Site personnel will be notified of these errors through regular  
428 communication with the Methods Centre. To respond to queries, study personnel should check the  
429 original forms for inconsistency and check other sources of participant records to determine the  
430 correction. Site personnel will then modify the data in the EDC system to reflect the correction and  
431 resubmit data to the Methods Centre in order to resolve the query.

432  
433 **5.4 Security and Back-Up of Data**

434 All CRFs must be kept secure in locked cabinets or other enclosures that are accessible only to study  
435 personnel. All electronic data must be password-protected and accessible only to study personnel. The  
436 Methods Centre will be responsible for backing up all data submitted through the REDCap Cloud  
437 system. The REDCap Cloud system is hosted on local, McMaster-based servers. Individual clinical  
438 sites and personnel will be provided with a unique user ID and granted access to only their local site  
439 information. Data exports will be strictly limited to the Methods Centre only.

440  
441 **6.0 ETHICS AND DISSEMINATION**

442 **6.1 Research Ethics Approval**

443 This protocol, CRFs, informed consent form, and any patient recruitment material will need to be  
444 reviewed and approved by the Hamilton Integrated Research Ethics Board (HiREB) for all clinical sites  
445 participating in the trial.

446  
447 **6.2 Consent**

448 Any patients who are deemed to meet all eligibility criteria should be approached to discuss  
449 participation in the trial by someone on the study team who is knowledgeable about the study. In order  
450 to obtain informed consent, study personnel should follow the below procedures:

- 451 • Present study information in a manner that is understandable to the patient.
- 452 • Discuss the study with the patient and answer any questions they ask.
- 453 • Allow the patient an opportunity to discuss participation with their family, friends, or family  
454 physician if desired.
- 455 • Confirm that the patient understands the risks and benefits of participating in the study and that  
456 their participation is voluntary.
- 457 • Complete and obtain signature(s) from the patient on the informed consent form.
- 458 • Provide/send the participant with a paper/electronic copy of the signed consent form.

459  
460 Consent may be obtained electronically or using pen and paper consent forms, as approved by HiREB.  
461 If potential participants are contacted by telephone, documenting written informed consent will involve  
462 the following procedures:

- 463 • The study team confirms the potential participant's interest in learning more about the study and  
464 verifies the mailing address, email address, cell phone (for texting), or fax number to which the  
465 consent form can be sent.
- 466 • A blank consent form is mailed, emailed, texted, or faxed along with a message that introduces  
467 the study and explains when the phone conversation will occur (**Appendix 1**).
- 468 • After the potential participant has received the document, a member of the study team calls the  
469 potential participant and walks through the entire document over the phone, answering  
470 questions and making notes about the potential participant's questions. Time and date of the  
471 conversation should be recorded.

- 472
- 473
- 474
- 475
- 476
- 477
- 478
- 479
- Once all questions are answered, the participant signs the consent form if they are willing to participate. S/he returns the consent form by mail, email, text, or fax.
  - Once received, the study team member who conducted the consent conversation should sign the consent form and date with today's date. To explain the discrepancy, this individual should also write a note on the consent form stating that the participant's consent was obtained by phone on xx date (the date the participant signed.)
  - The participant should receive back a fully-signed copy of the consent form for their records.

480 The process of obtaining and documenting informed consent will be completed in accordance with  
481 local Good Clinical Practice recommendations and HiREB requirements. Upon providing informed  
482 consent, trial participants will be followed for 6 weeks from their arthroscopic procedure. Given the  
483 short follow-up time, the need for a regular reassessment of consent will not apply; however,  
484 participants may withdraw their consent at any time.

### 485 **6.3 Confidentiality**

487 Information about study participants will be kept confidential and will be managed in accordance with  
488 the following rules:

- 489
- 490
- 491
- 492
- 493
- 494
- 495
- 496
- 497
- All study-related information will be stored securely at the clinical site.
  - All study participant information will be stored in locked file cabinets and be accessible only to study personnel.
  - All CRFs will be identified only by a coded participant number.
  - All records that contain participant names, or other identifying information (e.g. consent forms and contact information forms), will be stored separately from the study records that are identified only by the coded participant number and initials.
  - All databases will be password protected.

498 In the event that a participant revokes authorization to collect or use personal health information (PHI),  
499 the clinical site retains the ability to use all information collected prior to the revocation of participant  
500 authorization. For participants that have revoked authorization to collect or use PHI, attempts should be  
501 made to obtain permission to collect at least vital status (i.e. primary outcome data) at the end of their  
502 scheduled study period.

### 503 **6.4 Access to Data**

505 Only the Methods Centre will have access to the full study dataset. Data for the primary publication  
506 will be analyzed exclusively by the Methods Centre. Requests for access to the full study dataset for  
507 secondary publications are encouraged and can be initiated through a written request to the Methods  
508 Centre personnel. All requests will be reviewed by the Principal Investigators.

### 509 **6.5 Protocol Amendments**

511 Any amendments to the study protocol which may affect the conduct of the study, or the potential  
512 safety of or benefits to participants (e.g. changes to the study objectives, study design, sample size, or  
513 study procedures) will require a formal amendment to the protocol. Any protocol amendments will be  
514 approved by the Principal Investigators. The Methods Centre will submit amendment requests to  
515 HiREB in order to obtain approval for the amendment. Administrative changes (e.g. minor corrections  
516 or clarifications that have no effect on the way the study is conducted) will not need to undergo a  
517 formal amendment process and will be communicated to each clinical site when applicable.

518

519 **6.6 Adverse Event Reporting and Definitions**

520 6.6.1 Adverse Event

521 An adverse event (AE) is any symptom, sign, illness, or experience that develops or worsens in severity  
522 during the course of this study.

523

524 6.6.2 Serious Adverse Event

525 AEs are classified as serious or non-serious. A serious adverse event (SAE) is any AE that is any of the  
526 following:

527

- Fatal
- Life threatening
- Requires or prolongs hospital stay
- Results in persistent or significant disability or incapacity
- A congenital anomaly or birth defect
- An important medical event

528

529

530

531

532

533

534 6.6.3 Unanticipated Problems Resulting in Risk to Participant or Others

535 Any incident, experience, or outcome that meets all of the following criteria:

536

- Unexpected in nature, severity, or frequency (e.g. not described in study-related documents such as the ethics-approved protocol or consent form, etc.).
- Related or possibly related to participation in the research (i.e. possibly related means there is reasonable possibility that the incident experience, or outcome may have been caused by the procedures involved in the research).
- Suggests that the research places participants or others at greater risk of harm (including physical, psychological, economic, or social harm).

537

538

539

540

541

542

543

544

545 6.6.4 Serious Unexpected Adverse Drug Reactions

546 A serious adverse drug reaction means a noxious and unintended response to a drug that occurs at any  
547 dose and that requires in-patient hospitalization or prolongation of existing hospitalization, causes  
548 congenital malformation, results in persistent or significant disability or incapacity, is life-threatening  
549 or results in death. An adverse drug reaction is considered unexpected when its nature (i.e., specificity  
550 or outcome), severity or frequency is either not identified, or is not consistent with the term or  
551 description used in the product labelling.

552

553 6.6.5 Adverse Event Reporting

554 Clinical sites are responsible for reporting SAEs and serious unexpected adverse drug reactions  
555 immediately to the Methods Center via the REDCap Cloud system. Significant new information on  
556 ongoing SAEs should also be provided promptly to the Methods Center via the REDCap Cloud system.  
557 Unanticipated problems resulting in risk to participants or others are also to be reported promptly to the  
558 Methods Center.

559

560 The Methods Center will inform HiREB any serious unexpected adverse drug reaction within 48 hours  
561 of becoming aware of the information.

562

563 **6.7 Safety Monitoring**

564 A Medical Monitor will be sent regular updates to monitor the study data for safety. The Medical  
565 Monitor will provide medical expertise for study oversight and safety concerns and is required to  
566 provide recommendations about starting, continuing, and stopping the study. The Medical Monitor is  
an independent physician.

567  
568  
569  
570  
571  
572  
573  
574  
575  
576  
577  
578  
579  
580  
581  
582  
583  
584  
585  
586  
587  
588  
589  
590  
591  
592  
593  
594  
595  
596  
597  
598  
599  
600  
601  
602  
603  
604  
605  
606  
607  
608  
609  
610  
611  
612  
613

Specific responsibilities of the Medical Monitor include:

- reviewing study reports;
- protecting the safety of the study participants;
- reporting on the safety of the study;
- considering factors external to the study when relevant information becomes available, such as scientific or therapeutic developments that may have an impact on the safety of the participants or the ethics of the study;
- making recommendations to the Principal Investigators concerning continuation, termination, or other modifications of the study based on the observed beneficial or adverse effects of the treatments under study; and
- ensuring the confidentiality of the study data.

Methods Centre research personnel will prepare quarterly reports for the Medical Monitor to review. Reports will include enrollment over time and listings of demographics and baseline characteristics, excluded subjects, early withdrawals, CRF completeness, adverse events and serious adverse events. The Medical Monitor may direct additions and other modifications to the reports on a one-time or continuing basis. The Medical Monitor may request a formal meeting with the Principal Investigators and Research Manager at any time to discuss the conduct and progress of the study, including patient accrual, compliance with protocol, and problems encountered, as well as any patient safety concerns.

Following each quarterly review, the Medical Monitor will provide a recommendation to continue or terminate the study. A recommendation to terminate the study should be transmitted to the Research Manager and Principal Investigators immediately, who would then notify the site investigators and HiREB immediately. All patients currently enrolled in the study would also be notified.

### 6.8 Ethical Considerations

This study is to be conducted according to the US and international standards of Good Clinical Practice and International Conference on Harmonization guidelines, applicable government regulations, and institutional research policies and procedures.

## 7.0 STUDY TEAM AND MANAGEMENT

The study will be managed through the MacSports Methods Centre at McMaster University. Dr. Ayeni is the Director of this research group as part of the Centre for Evidence-Based Orthopaedics at McMaster University. Dr. Ayeni will be responsible for the daily high-level oversight and conduct of this study. Dr. Ayeni will be supported by a multi-disciplinary team of co-investigators and a core team of Co-Principal Investigators (**Figure 1**).

### 7.1 Study Committees

The Steering Committee will provide guidance and direction to the overall study. This committee consists of world experts in their respective fields and many members have experience leading large multi-centre clinical trials (**Appendix 3**). Specific responsibilities of the Steering Committee include reviewing and approving the study protocol and working together to resolve any challenges that arise during the study.

### Figure 1: Study organization



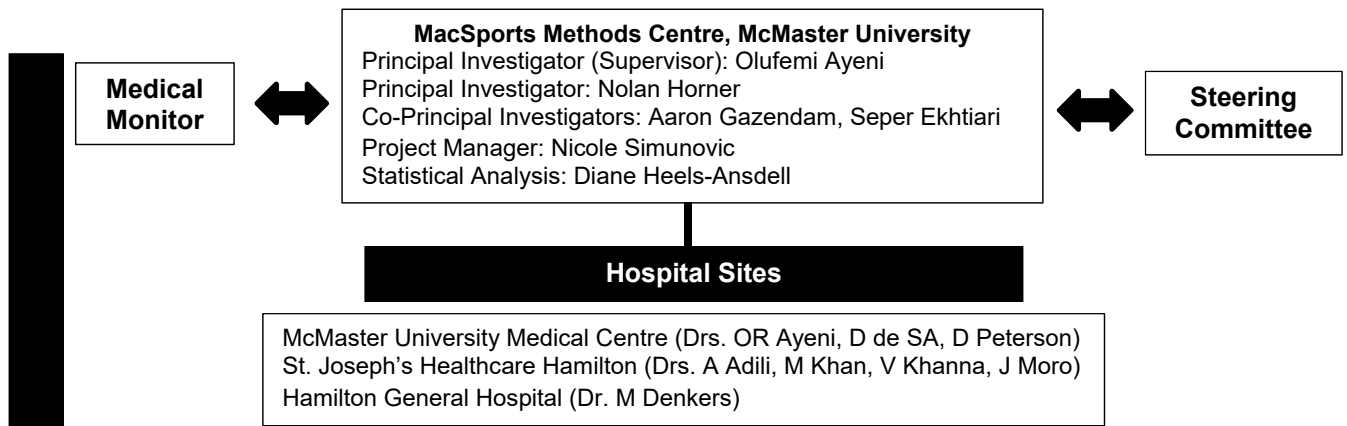

614  
615  
616

617 **8.0 REFERENCES**

- 618 1. International Narcotic Control Board. Narcotic Drugs Technical report: Estimated World  
619 Requirements for 2017 - Statistics for 2015. (2017).
- 620 2. Kim B, Nolan S, Ti L. Addressing the prescription opioid crisis: Potential for hospital-based  
621 interventions? *Drug Alcohol Rev.* 2017;36(2):149–152.
- 622 3. Government of Canada. Responding to Canada’s opioid crisis. Available at:  
623 [https://www.canada.ca/en/health-canada/services/substance-abuse/prescription-drug-](https://www.canada.ca/en/health-canada/services/substance-abuse/prescription-drug-abuse/opioids/responding-canada-opioid-crisis.html)  
624 [abuse/opioids/responding-canada-opioid-crisis.html](https://www.canada.ca/en/health-canada/services/substance-abuse/prescription-drug-abuse/opioids/responding-canada-opioid-crisis.html).
- 625 4. Special Advisory Committee on the Epidemic of Opioid Overdose. National report: Apparent  
626 opioid-related deaths in Canada (January 2016 to September 2017). Available at: [https://health-](https://health-infobase.canada.ca/substance-related-harms/opioids/)  
627 [infobase.canada.ca/substance-related-harms/opioids/](https://health-infobase.canada.ca/substance-related-harms/opioids/). (2018).
- 628 5. City of Hamilton. Hamilton Opioid Information System - Deaths. Available at:  
629 <https://www.hamilton.ca/public-health/reporting/hamilton-opioid-information-system-deaths>.  
630 Updated 3-Apr-2020.
- 631 6. Kosten T, George T. The neurobiology of opioid dependence: implications for treatment. *Sci Pract*  
632 *Perspect.* 2002;1:13–20.
- 633 7. Volkow ND, McLellan TA, Cotto JH, Karithanom M, Weiss SRB. Characteristics of opioid  
634 prescriptions in 2009. *JAMA.* 2011;305:1299–1301.
- 635 8. Wilson JLC, Poulin PA, Sikorski R, Nathan HG, Taljaard M, Smyth C. Opioid use among same-  
636 day surgery patients: prevalence, management and outcomes. *Pain Res Manag.* 2015;20:300–304.
- 637 9. Thiels CA, Anderson SS, Ubl DS, Hanson KT, Bergquist WJ, Gray RJ, Gazelka HM, Cima RR,  
638 Habermann EB. Wide variation and overprescription of opioids after elective surgery. *Ann Surg.*  
639 2017;266:564–573.
- 640 10. Bicket MC, Long JJ, Pronovost PJ, Alexander GC, Wu CL. Prescription opioid analgesics  
641 commonly unused after surgery: a systematic review. *JAMA Surg.* 2017;152:1066–1071.
- 642 11. Lindenhovius ALC, Helmerhorst GTT, Schnellen AC, Vrahas M, Ring D, Kloen P. Differences in  
643 prescription of narcotic pain medication after operative treatment of hip and ankle fractures in the  
644 United States and the Netherlands. *J Trauma - Inj Infect Crit Care.* 2009;67:160–164.
- 645 12. Helmerhorst GTT, Lindenhovius ALC, Vrahas M, Ring D, Kloen P. Satisfaction with pain relief  
646 after operative treatment of an ankle fracture. *Injury.* 2012;43:1958–1961.
- 647 13. Helmerhorst GTT, Zwiers R, Ring D, Kloen P. Pain relief after operative treatment of an extremity  
648 fracture a noninferiority randomized controlled trial. *J Bone Joint Surg Am.* 2017;99:1908–1915.
- 649 14. Daniels SD, Garvey KD, Collins JE, Matzkin EG. Patient satisfaction with nonopioid pain  
650 management following arthroscopic partial meniscectomy and/or chondroplasty. *Arthroscopy.*  
651 2019;35(6):1641-1647.
- 652 15. Garrett WE Jr, Swiontkowski MF, Weinstein JN, et al. American Board of Orthopaedic Surgery  
653 Practice of the Orthopaedic Surgeon: Part-II, certification examination case mix. *J Bone Joint Surg*  
654 *Am.* 2006;88(3):660-667.
- 655 16. Ekhtiari S, Horner NS, Shanmugaraj A, Duong A, Simunovic N, Ayeni OR. Narcotic prescriptions  
656 following knee and shoulder arthroscopy: a survey of the Arthroscopy Association of Canada.  
657 *Cureus.* 2020;12(4):e7856
- 658 17. Wojahn RD, Bogunovic L, Brophy RH, et al. Opioid consumption after knee arthroscopy. *J Bone*  
659 *Joint Surg Am.* 2018;100(19):1629-1636.
- 660 18. Fujii MH, Hodges AC, Russell RL, et al. Post-discharge opioid prescribing and use after common  
661 surgical procedure. *J Am Coll Surg.* 2018;226(6):1004-1012.
- 662 19. Hartford LB, Van Koughnett JAM, Murphy PB, et al. Standardization of Outpatient Procedure  
663 (STOP) Narcotics: A prospective non-inferiority study to reduce opioid use in outpatient general  
664 surgical procedures. *J Am Coll Surg.* 2019;228(1):81-88.

- 665 20. Murray DM, Varnell SP, Blitstein JL. Design and analysis of group-randomized trials: a review of  
666 recent methodological developments. *Am J Public Health*. 2004;94(3):423-32.
- 667 21. Price DD, McGrath PA, Rafii A, Buckingham B. The validation of visual analogue scales as ratio  
668 scale measures for chronic and experimental pain. *Pain*. 1983;17:45-56.
- 669 22. MP Jensen, P Karoly. The measurement of clinical pain intensity: a comparison of six methods.  
670 *Pain*. 1986;27:117–26.
- 671 23. Collins S, Moore A, McQuay H. The visual analog pain intensity scale: what is moderate pain in  
672 millimeters? *Pain*. 1997;72:95–7.
- 673 24. Ho K, Spence J, Murphy M. Review of pain measurement tools. *Ann Emerg Med*. 1996;27:427–31.
- 674 25. CMS.gov. HCAHPS: Patients’ Perspectives of Care Survey. Available at:  
675 [https://www.cms.gov/Medicare/Quality-Initiatives-Patient-Assessment-](https://www.cms.gov/Medicare/Quality-Initiatives-Patient-Assessment-Instruments/HospitalQualityInits/HospitalHCAHPS)  
676 [Instruments/HospitalQualityInits/HospitalHCAHPS](https://www.cms.gov/Medicare/Quality-Initiatives-Patient-Assessment-Instruments/HospitalQualityInits/HospitalHCAHPS). Updated 11-Feb-2020.
- 677 26. Bot AGJ, Bekkers S, Arnstein PM, Smith RM, Ring D. Opioid use after fracture surgery correlates  
678 with pain intensity and satisfaction with pain relief. *Clin Orthop Relat Res*. 2014;472(8):2542-9.
- 679 27. Thoma A, Farrokhyar F, Mcknight L, Bhandari M. How to optimize patient recruitment. *Can J*  
680 *Surg*. 2010;53:205–210.
- 681 28. Rutterford C, Copas A, Eldridge S. Methods for sample size determination in cluster randomized  
682 trials. *Int J Epidemiol*. 2015;44(3):1051-1067.
- 683 29. Little RJA, Rubin DB. *Statistical analysis with missing data*. New York: John Wiley & Sons, 1987.

684 **Appendix 1: (A) Telephone Script and (B) Message for Sending Consent Form**

685

686 **(A) No PAIN Telephone Consent Script**

687 Following introduction to the study by the surgeon, permission to be contacted via telephone is obtained and  
688 communicated to the research team. The patient is either given the consent form in person or it is sent via  
689 email for a chance to review before they are contacted.

690

691 Below is a script to follow when contacting patients.

692

693 **Introduction**

694 1) Study Personnel: "Hello, my name is \_\_\_\_\_ and I am calling regarding a study that aims to reduce  
695 the over prescription and use of narcotic pain medications that you had discussed in clinic with your  
696 surgeon. Do you have some time to talk?"

697

698 a. Yes -> Proceed to explain background information (2)

699 b. No -> Ask if they would be available at another time and schedule a time to call back. If not  
700 interested, inquire as to why not and complete a screening form for an excluded patient.

701

702 2) "Great. Have you had a chance to look over the information sheet provided to you in clinic or over  
703 email? Let's go through it all together now. Feel free to ask any questions as we go."

704

705 **Informed Consent Form**

706 3) Go through the ICF in its entirety.

707

708 **Consent**

709 4) "Would you be interested in participating?"

710 a. Yes -> "Great. Please ensure you sign the consent form I sent you via email and be sure to  
711 initial each page. Please send a scanned copy back to me via email or text. Now, I'd like to  
712 complete some questions about how you're feeling today if you'd like to continue, or we can  
713 do it in person prior to surgery."

714 i. In person -> End the call after confirming they received the consent form to sign and  
715 thank them for agreeing to participate. Let them know they can contact you if they  
716 have any questions at any point and provide your contact information.

717 ii. Continue questions -> complete baseline questionnaires.

718 b. No -> "May I ask why?" Try to answer any questions or concerns and gauge interest. If they do  
719 not want to provide consent, thank them for their time then fill a screening form for an  
720 excluded patient.

721

722 **(B) Email Draft to Prospective Participants**

723

724 Hello [Participant name],

725

726 I am reaching out to you regarding the study that is looking at reducing the over prescription of narcotic pain  
727 medications, also known as opioids, after surgery. You had initially discussed this with your surgeon at the  
728 clinic. As discussed, the study information sheet is attached to this email. Please review this information sheet  
729 prior to the call with the research personnel and make note of any questions you have for us.

730

731 We will give you a call on or around [date and time] to explain the study in more detail.

732

733 Regards, [Your name]

734 **Appendix 2: Patient Education Infographic**

735

**Recommendations:**

- The use of ice, heat or physical therapy can reduce inflammation and pain.
- Your pain should subside daily after your surgery. Many patients do not use any opioids after the third day after surgery.
- Complete your medication diary, and keep track of your medication use, including opioids and non-opioid medications.
- Ask your doctor about whether you need additional pain management strategies, including prescription renewals or alternative treatments.
- With opioids, there is a fine balance between effective pain control and dangerous side effects. If you have questions, please contact the Research Team.
- When you no longer need your medication to help control your pain; remember to return anything you have not used to your pharmacy. They can dispose of it safely for you.

**If you have any questions, please contact your Doctor, or the Research Team**

Study Contact Information

Research Team

[no.pain.hamilton@gmail.com](mailto:no.pain.hamilton@gmail.com)

Research Coordinator

Andrew Duong  
[duonga@mcmaster.ca](mailto:duonga@mcmaster.ca)  
 905-923-2126

Non-Opioid Prescriptions after Arthroscopic Surgery in Canada: A Randomized Controlled Trial

Reducing Pain Without Opioids

736  
737

**Pain Medication**

You have received a prescription for Acetaminophen (Tylenol) and Naproxen (Aleve, Naprosyn). We recommend these as **"FIRST STEP"** pain medications.

- Acetaminophen can be taken every 4 hours
- Naproxen can be taken every 12 hours for pain.
- For the first week, take both of these medications on a regular basis even when experiencing minimal pain in an effort to stop post-operative pain before it starts.
- Only in cases where pain persists 1-2 hours after use of Acetaminophen and Naproxen should the opioid prescription (Morphine) be used.

Opioids are intended to improve your pain enough so that you are able to do your day to day activities, but **not reduce your pain to zero.**

**The Risk of Addiction**

Many people have used opioids without problems. However, serious problems, including overdose and addiction, have happened. It is important to follow the instruction on the prescription and use the lowest possible dose for the shortest possible time, and to be aware of signs of side effects or dependence.

Nearly **60%** of deaths had **ONLY** prescribed opioids present at death

In 2016: **1 in 3** opioid-related deaths occurred among people with active opioid prescriptions

**40%** of emergency department visits for an opioid overdose had an active opioid prescription

**Managing Opioid Use**

Pain management after surgery is about reducing pain so that you can return to normal activities. The goal is to not hit zero on the pain scale, but to avoid levels 8 and above.

Only consider opioid use when your pain levels are more than Severe (level 8).

**Potential Side Effects of Opioid Use**

Nausea, Constipation, Dizziness, Drowsiness, Reduced Physical or Mental Abilities, Depression, Respiratory Issues, Reduced Blood Pressure, Heart Palpitations, Irregular Heartbeat, Problems Sleeping, Including Sleep Apnea, Vision Problems. Other underlying health issues may put you at higher risk or worsen the potential side effects.

Courtesy of Gomes et al (2018). The BMJ, 362, k3207.

738

**Appendix 3: Members of the NO PAin Multi-Disciplinary Steering Committee**

| <b>Member</b>                   | <b>Role</b>                                                                                                                                                                                                                                                                                                                                                                                                                                                                                                                                                                                                                                                            |
|---------------------------------|------------------------------------------------------------------------------------------------------------------------------------------------------------------------------------------------------------------------------------------------------------------------------------------------------------------------------------------------------------------------------------------------------------------------------------------------------------------------------------------------------------------------------------------------------------------------------------------------------------------------------------------------------------------------|
| <b>Dr. Olufemi Ayeni</b>        | Dr. Ayeni will be acting as the Principal Investigator, Scientific Mentor, and Supervisor for this study. He is an attending orthopedic surgeon and site chief at MUMC. Dr. Ayeni is a world expert in arthroscopic surgery and has been invaluable in guiding in such a way that it is acceptable to other arthroscopic surgeons in the city. Dr. Ayeni's training and experience with conducting research and successfully leading large RCTs will be invaluable to the success of this study. He has successfully conducted the Femoroacetabular Impingement Randomised Controlled Trial (FIRST), which was completed in 2019. He leads several other large trials. |
| <b>Dr. Nolan Horner</b>         | A 4th year orthopaedic surgery resident at McMaster University, with an extensive track record of high impact publications and project completions and the Principal Investigator for the project. Dr. Horner had led in the development of all stages of this research question and trial design.                                                                                                                                                                                                                                                                                                                                                                     |
| <b>Dr. Caitlin VanDeCapelle</b> | A staff anesthesiologist at HHS with a clinical interest in peri-operative pain control and will advise on the pain management in the intraoperative and immediate peri-operative period.                                                                                                                                                                                                                                                                                                                                                                                                                                                                              |
| <b>Dr. Seper Ekhtiari</b>       | A 3rd year orthopaedic surgery resident at McMaster University who is currently taking time off clinical duties to complete his Master's degree at McMaster University. Dr. Ekhtiari will act as a Co-Principal Investigator for this trial.                                                                                                                                                                                                                                                                                                                                                                                                                           |
| <b>Dr. Aaron Gazendam</b>       | A 2nd year orthopaedic surgery resident at McMaster University and will be acting as the Co-Principal Investigator and Project Officer for the project. Starting August 2020, Dr. Gazendam will be taking one year off clinical duties to complete his Master's degree at McMaster university. He will aid in day-to-day running of the trial and organization of the research assistants.                                                                                                                                                                                                                                                                             |
| <b>Franca Mossuto</b>           | A peri-operative orthopaedic service resource nurse at HHS, is actively involved in orthopaedic clinical trials at HHS. She will coordinate education sessions with the peri-operative nursing teams and will ensure that the proposed methodology will be feasible in the clinical setting at HHS.                                                                                                                                                                                                                                                                                                                                                                    |
| <b>Eric Romeril</b>             | Has a clinical interest in peri-operative pain control and works with the total joint arthroplasty service as HHS to reduce opioid consumption following joint replacement surgery. He will advise on the optimal non-opioid pharmacologic pain management strategies peri-operatively.                                                                                                                                                                                                                                                                                                                                                                                |
| <b>Steve Phillips</b>           | A patient who previously underwent an anterior cruciate ligament reconstruction in Guelph and had some of their follow-up care performed at HHS. Steve Phillips will act as the patient experience advisor.                                                                                                                                                                                                                                                                                                                                                                                                                                                            |
