# Supplementary material
Source: PubMed Central journal article supplement (PMC9533185)
Supplement: jama-e2216844-s002.pdf [file jama-e2216844-s002.pdf]

1  
2  
3  
4  
5  
6  
7  
8  
9  
10  
11  
12  
13  
14  
15  
16  
17  
18  
19  
20  
21  
22  
23  
24  
25  
26  
27  
28  
29  
30  
31  
32  
33  
34  
35  
36  
37

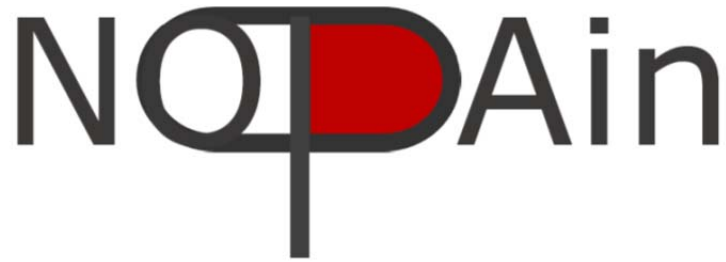

**Non-Opioid Prescriptions after Arthroscopic Surgery in Canada (NO PAin): A Randomized Controlled Trial**

**Statistical Analysis Plan**

**Version 1.0**

**Date:** 27-Apr-2022

**Prepared by:**

Seper Ekhtiari

Aaron Gazendam

Nolan Horner

Nicole Simunovic

Diane Heels-Ansdell

Kim Madden

Olufemi R. Ayeni

On behalf of the NO PAin Investigators

38 **Document History**  
39

| <b>Date<br/>(dd-mmm-<br/>yy)</b> | <b>Drafted/Revised By:</b>                                                               | <b>Version<br/>Number</b> | <b>Description of Amendments</b>                       |
|----------------------------------|------------------------------------------------------------------------------------------|---------------------------|--------------------------------------------------------|
| 27-Apr-2022                      | S. Ekhtiari, A. Gazendam,<br>N. Horner, N. Simunovic,<br>D. Heels-Ansdell, O.R.<br>Ayeni | 1.0                       | First draft of SAP based on original<br>trial protocol |

40  
41  
42  
43  
44  
45  
46  
47  
48  
49  
50  
51  
52  
53  
54  
55  
56  
57  
58  
59  
60  
61  
62  
63  
64  
65  
66  
67  
68  
69  
70  
71  
72  
73  
74  
75  
76

77 **INTRODUCTION**

78 NO Pain is a multi-centre, randomized controlled trial (RCT) evaluating adult (18+ years of age)  
79 patients undergoing outpatient knee or shoulder arthroscopy. Patients were randomized to an opioid  
80 sparing postoperative protocol (intervention) or the current standard of care (control). The intervention  
81 consisted of a standardized non-opioid analgesic prescription, a limited rescue opioid prescription, and a  
82 patient education infographic. The control was defined as the treating surgeons' pre-trial postoperative  
83 analgesic regimen, which typically included an opioid prescription. Patients were followed up at 2 and 6  
84 weeks postoperatively. The primary outcome was the total amount of opioids consumed at 6 weeks  
85 postoperatively. Secondary outcomes included patient-reported pain and satisfaction, quantity of oral  
86 morphine equivalents (OMEs) prescribed, number of opioid refill requests completed (i.e., number of  
87 patients who requested and received a refill script), and any adverse events up to 6 weeks  
88 postoperatively.

89  
90 **Primary Endpoint**

91 The primary outcome is the total amount of opioids consumed in the 6-week postoperative period. This  
92 was calculated as OMEs based on published conversion methods<sup>1</sup> (**Appendix 1**).

93  
94 **Secondary Endpoints**

95 The secondary outcomes are the following measured at 6 weeks:

- 96 1) Patient-reported pain, as measured on a 100-point Visual Analogue Scale (VAS)
- 97 2) Patient-reported satisfaction, measured using a modified question from the Hospital Consumer  
98 Assessment of Healthcare providers and Systems (HCAHPS) questionnaire
- 99 3) Number of OMEs prescribed at time of hospital discharge
- 100 4) Proportion of patients who had an opioid refill request completed within 6 week postoperatively
- 101 5) Adverse events up to 6 weeks postoperatively

102  
103 **Scope of the Analysis plan**

104 This Statistical Analysis Plan presents the analyses for the NO PAin primary manuscript. The  
105 manuscript will include 6-week follow-up data for the trial.

106  
107 **ANALYSIS PLAN**

108 **Blinded Analysis**

109 The primary analysis will be completed using blinded data. Treatment groups will be identified using  
110 coded identifiers (i.e., treatment A and B). Analyses will be performed and interpretations documented  
111 based on these blinded treatment groups, prior to unblinding.

112  
113 **Presentation of Data**

114 The baseline demographic characteristics and surgical procedures performed will be summarized  
115 descriptively by treatment group and reported as mean (standard deviation [SD]), median (interquartile  
116 range [IQR]), or count (percent) as appropriate (**Tables 1 and 2**). All statistical tests will be 2-tailed  
117 with  $p < 0.05$  considered statistically significant. All analyses will be performed on an intention-to-treat  
118 basis.

119  
120 **Primary Outcome Analysis**

121 The primary analysis will be an independent samples t-test to compare the total 6-week OMEs  
122 consumed by each group (**Table 3**). Patients who were randomized but did not undergo surgery will be

123 excluded from the analysis. For all patients who did undergo surgery, missing data will be handled using  
124 the method of multiple imputation. The effect size will be reported as the mean difference in OMEs  
125 consumed, with associated 95% confidence interval (CI) and p-value. If the data are not normally  
126 distributed, a log transformation will be performed prior to conducting the t-test. If following log  
127 transformation, the data are still not normally distributed, we will conduct a Wilcoxon rank sum test on  
128 the untransformed data, instead of a t-test.

129

### 130 **Secondary Outcomes Analysis**

131 The secondary outcome analyses will be performed for patient-reported pain, patient-reported  
132 satisfaction, number of OMEs prescribed, incidence of opioid refill requests, and adverse events up to 6  
133 weeks (**Table 3**).

134

135 Continuous outcomes will be analyzed using an independent samples t-test and reported as mean  
136 differences with corresponding 95% CIs and p-values. Similar to the analysis of the primary outcome, if  
137 the data are not normally distributed, we will first log transform and if the data are still not normally  
138 distributed, we will use the nonparametric Wilcoxon rank sum test. Dichotomous outcomes will be  
139 analyzed using a chi-squared test and reported as odds ratios with 95% CIs and p-values. As specified in  
140 our original protocol, patient-reported satisfaction will be dichotomized from a four-point Likert scale to  
141 include the response ‘always’ and ‘usually’ as satisfied patients, and ‘sometimes’ and ‘never’ as  
142 unsatisfied patients. Missing data will be handled using the method of multiple imputation. No  
143 adjustments will be made for multiple comparisons. The analysis of our secondary outcomes is mainly  
144 hypothesis generating. Additionally, all adverse events will be detailed in a separate table (**Table 4**).

145

### 146 **Sensitivity Analysis**

147 We will perform a sensitivity analysis to assess the impact of missing data and multiple imputation, by  
148 performing the analysis of the primary outcome including complete cases only and comparing this  
149 analysis with our analysis outlined above (i.e., using multiple imputation).

150

### 151 **Subgroup Analyses**

152 In our original NO PAin protocol<sup>2</sup>, we pre-specified three subgroup analyses, comparing:

153

154 1) Shoulder versus knee arthroscopy patients – Hypothesis: the intervention will be more effective  
155 among patients undergoing knee arthroscopy versus shoulder arthroscopy, as the latter is  
156 typically considered to be a more painful procedure.

157

158 2) Patients who received a regional block of any kind as part of their anaesthetic versus those who  
159 did not – Hypothesis: the intervention will be more effective among patients receiving a regional  
160 block, as they can be expected to experience less pain overall.

161

162 3) Males versus females – Hypothesis: the intervention will be more effective among male patients,  
163 as they are at higher risk of opioid overuse following a surgical procedure<sup>3</sup>.

164

165 These subgroup analyses will be performed as a linear regression of the primary outcome, including  
166 treatment by subgroup interactions to assess whether the magnitude of the treatment effect is  
167 significantly different between these subgroups (**Figure 1**).

168 **PROPOSED TABLES AND FIGURES**

169

170 **Table 1. Patient Demographics**

| <b>Characteristics</b>                                                                                                               | <b>Treatment A<br/>N=</b> | <b>Treatment B<br/>N=</b> | <b>Total<br/>N=</b> |
|--------------------------------------------------------------------------------------------------------------------------------------|---------------------------|---------------------------|---------------------|
| <b>Age, mean (SD)</b>                                                                                                                |                           |                           |                     |
| <b>Sex, n (%)</b><br>Males<br>Females                                                                                                |                           |                           |                     |
| <b>BMI, n (%)</b><br>Underweight <18.5<br>Normal weight 18.5 to <25<br>Overweight 25 to <30<br>Obese 30 to <40<br>Morbidly obese ≥40 |                           |                           |                     |
| <b>Use of Tobacco Products, n (%)</b><br>No<br>Yes<br>Yes, quit                                                                      |                           |                           |                     |
| <b>Alcohol Consumption, n (%)</b><br>No alcohol at baseline<br>Yes, < 5 drinks/week<br>Yes, > 5 drinks/week                          |                           |                           |                     |
| <b>Sport Activity Level, n (%)</b><br>None<br>Light<br>Moderate                                                                      |                           |                           |                     |
| <b>Co-morbidities, n (%)</b><br>Osteopenia<br>Osteoporosis<br>Lung disease<br>Asthma<br>Etc... (add based on data)                   |                           |                           |                     |
| <b>Employment Status, n (%)</b><br>Employed<br>Not employed, retired<br>Not employed, other                                          |                           |                           |                     |
| <b>Type of Injury, n (%)</b><br>Knee<br>Shoulder                                                                                     |                           |                           |                     |

171

172 **Table 2. Surgical Details**

| <b>Variable</b>                                                                                                       | <b>Treatment A<br/>N=</b> | <b>Treatment B<br/>N=</b> | <b>Total<br/>N=</b> |
|-----------------------------------------------------------------------------------------------------------------------|---------------------------|---------------------------|---------------------|
| <b>Operative Joint, n (%)</b><br>Knee<br>Shoulder                                                                     |                           |                           |                     |
| <b>Side, n (%)</b><br>Right<br>Left                                                                                   |                           |                           |                     |
| <b>Knee Procedures Performed, n (%)</b><br>ACL reconstruction (+/- LET)<br>MPFL reconstruction (not including<br>TTO) |                           |                           |                     |

NO PAin SAP

| Variable                                                                                                                                                                                                                                                                                                                                                    | Treatment A<br>N= | Treatment B<br>N= | Total<br>N= |
|-------------------------------------------------------------------------------------------------------------------------------------------------------------------------------------------------------------------------------------------------------------------------------------------------------------------------------------------------------------|-------------------|-------------------|-------------|
| Chondroplasty<br>Meniscectomy<br>Meniscal repair<br>Meniscal transplant<br>Microfracture<br>Autologous Chondrocyte Implantation<br>Osteochondral lesion fixation<br>Irrigation and/or debridement<br>Loose body removal<br>Synovectomy<br>Etc... (add based on data)                                                                                        |                   |                   |             |
| <b>Shoulder Procedures Performed, n (%)</b><br>Subacromial decompression<br>Rotator cuff repair<br>Shoulder stabilization<br>Superior capsular reconstruction<br>Biceps tenotomy/tenodesis<br>Capsular release<br>SLAP repair<br>Diagnostic arthroscopy<br>Irrigation and/or debridement<br>Loose body removal<br>Synovectomy<br>Etc... (add based on data) |                   |                   |             |
| <b>Anesthetic Strategy, n (%)</b><br>General Anesthetic<br>Spinal Anesthetic<br><b>Regional Block, n (%)</b><br>Yes<br>No                                                                                                                                                                                                                                   |                   |                   |             |

173

174

**Table 3. Study Outcomes by Treatment Group**

|                                                                                                                                   | Total<br>N= | Treatment<br>A<br>N= | Treatment<br>B<br>N= | Mean Difference*<br>(95% CI) | p-value |
|-----------------------------------------------------------------------------------------------------------------------------------|-------------|----------------------|----------------------|------------------------------|---------|
|                                                                                                                                   | mean (SD)   | mean (SD)            | mean (SD)            |                              |         |
| <b>Primary Outcome</b><br>(Total OMEs consumed)                                                                                   |             |                      |                      |                              |         |
| <b>Secondary Outcomes</b>                                                                                                         |             |                      |                      |                              |         |
| Patient-reported pain (VAS)                                                                                                       |             |                      |                      |                              |         |
| OMEs prescribed                                                                                                                   |             |                      |                      |                              |         |
|                                                                                                                                   | n (%)       | n (%)                | n (%)                | Odds Ratio**<br>(95% CI)     | p-value |
| <b>Patient-reported satisfaction</b><br><b>Satisfied</b> (“Always”,<br>“Usually”)<br><b>Unsatisfied</b> (“Sometimes”,<br>“Never”) |             |                      |                      |                              |         |
| <b>Opioid Refill Request<br/>completed</b>                                                                                        |             |                      |                      |                              |         |
| <b>Any Adverse Events</b>                                                                                                         |             |                      |                      |                              |         |

175

176 **Table 4. Adverse Events**

|                                                                                                                         | Treatment A<br>N (%) | Treatment B<br>N (%) | Total<br>N (%) |
|-------------------------------------------------------------------------------------------------------------------------|----------------------|----------------------|----------------|
| Deep vein thrombosis<br>Calf swelling and leg pain<br>Adhesive Capsulitis<br>Baker’s Cyst<br>Etc... (add based on data) |                      |                      |                |

177  
178 **Figure 1. Subgroup Analyses of the Primary End Point, According to Treatment Group**  
Subgroup Mean Difference (95%CI)

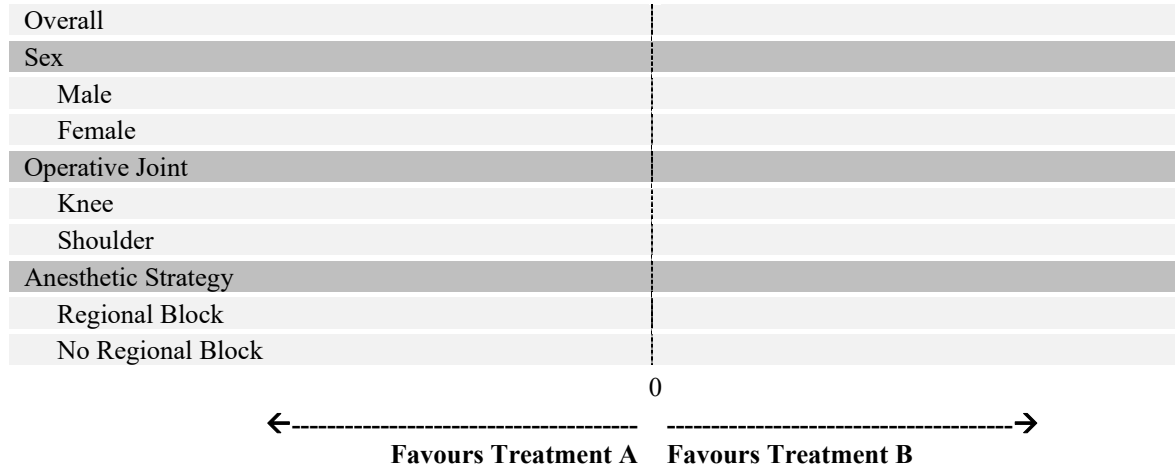

179  
180 **Appendix 1 – Oral Morphine Equivalents (OMEs) Conversion Chart (Adapted from**  
181 **Centers for Disease Control)<sup>1</sup>**  
182

| Opioid        | Conversion Factor |
|---------------|-------------------|
| Codeine       | 0.15              |
| Hydrocodone   | 1                 |
| Hydromorphone | 4                 |
| Morphine      | 1                 |
| Oxycodone     | 1.5               |
| Oxymorphone   | 3                 |

183  
184  
185 **REFERENCES**

186 1. Centers for Disease Control and Prevention (CDC). Analyzing Prescription Data and  
187 Morphine Milligram Equivalents (MME). *Data Resour | Drug Overdose | CDC Inj Cent.*  
188 2019.

189 2. NO PAIn Investigators. Protocol for a multicenter randomized controlled trial comparing a  
190 non-opioid prescription to the standard of care for pain control following arthroscopic  
191 knee and shoulder surgery. *BMC Musculoskelet Disord.* 2021 May 22;22(1):471.

192 3. Sun EC, Darnall BD, Baker LC, Mackey S. Incidence of and Risk Factors for Chronic  
193 Opioid Use Among Opioid-Naive Patients in the Postoperative Period. *JAMA Intern Med.*  
194 2016 Sep 1;176(9):1286-93.
