# Supplementary material
Source: PubMed Central journal article supplement (PMC9533185)
Supplement: jama-e2216844-s003.pdf [file jama-e2216844-s003.pdf]

## Supplemental Online Content

Gazendam A, Ekhtiari S, Horner NS, et al; Writing Committee for the No Pain Trial Investigators. Effect of a postoperative multimodal opioid-sparing protocol vs standard opioid prescribing on postoperative opioid consumption after knee or shoulder arthroscopy: a randomized clinical trial. *JAMA*. doi:10.1001/jama.2022.16844

**eTable 1.** List of included procedures

**eFigure 1.** Patient education infographic

**eTable 2.** Oral morphine equivalents (OMEs) conversion chart

**eFigure 2.** Histogram of opioid consumption by group

**eFigure 3.** Mean daily pain scores (VAS) over the first 14 days by group

**eFigure 4.** Primary outcome with subgroup analyses

**eTable 3.** Patient satisfaction at 2 weeks

**eTable 4.** Patient satisfaction at 6 weeks

This supplemental material has been provided by the authors to give readers additional information about their work.

**eTable 1.** List of included procedures.

| Knee                                                                                                                                                                                                                                        | Shoulder                                                                                                                                                                      | Shoulder and Knee                                                                            |
|---------------------------------------------------------------------------------------------------------------------------------------------------------------------------------------------------------------------------------------------|-------------------------------------------------------------------------------------------------------------------------------------------------------------------------------|----------------------------------------------------------------------------------------------|
| ACL reconstruction (with or without LET)<br>MPFL reconstruction ( <b>not</b> including TTO)<br>Chondroplasty<br>Meniscectomy<br>Meniscal repair<br>Meniscal transplant<br>Microfracture<br>ACI<br>Fixation of unstable osteochondral lesion | Subacromial decompression<br>Rotator cuff repair<br>Shoulder stabilization<br>Superior capsule reconstruction<br>Biceps tenotomy/tenodesis<br>Capsular release<br>SLAP repair | Diagnostic arthroscopy<br>Irrigation and/or debridement<br>Loose body removal<br>Synovectomy |

eFigure 1. Patient education infographic

**Recommendations:**

- The use of ice, heat or physical therapy can reduce inflammation and pain.
- Your pain should subside daily after your surgery. Many patients do not use any opioids after the third day after surgery.
- Complete your medication diary, and keep track of your medication use, including opioids and non-opioid medications.
- Ask your doctor about whether you need additional pain management strategies, including prescription renewals or alternative treatments.
- With opioids, there is a fine balance between effective pain control and dangerous side effects. If you have questions, please contact the Research Team.
- When you no longer need your medication to help control your pain, remember to return anything you have not used to your pharmacy. They can dispose of it safely for you.

**If you have any questions, please contact your Doctor, or the Research Team**

**Study Contact Information**

**Research Team**

[no.pain.hamilton@gmail.com](mailto:no.pain.hamilton@gmail.com)

**Research Coordinator**

**Andrew Duong**  
[duonga@mcmaster.ca](mailto:duonga@mcmaster.ca)  
905-923-2126

**Non-Opioid Prescriptions after Arthroscopic Surgery in Canada: A Randomized Controlled Trial**

**Reducing Pain Without Opioids**

**PAIN CONTROL** **DANGEROUS SIDE EFFECTS**

Safe balance between pain control and side effects requires regular assessment of opioid effect and need

**eTable 2 – Oral morphine equivalents (OMEs) conversion chart**

| <b>Opioid</b> | <b>Conversion Factor</b> |
|---------------|--------------------------|
| Codeine       | 0.15                     |
| Hydrocodone   | 1                        |
| Hydromorphone | 4                        |
| Morphine      | 1                        |
| Oxycodone     | 1.5                      |
| Oxymorphone   | 3                        |

Adapted from Centers for Disease Control.

eFigure 2 -- Histogram of opioid consumption by group

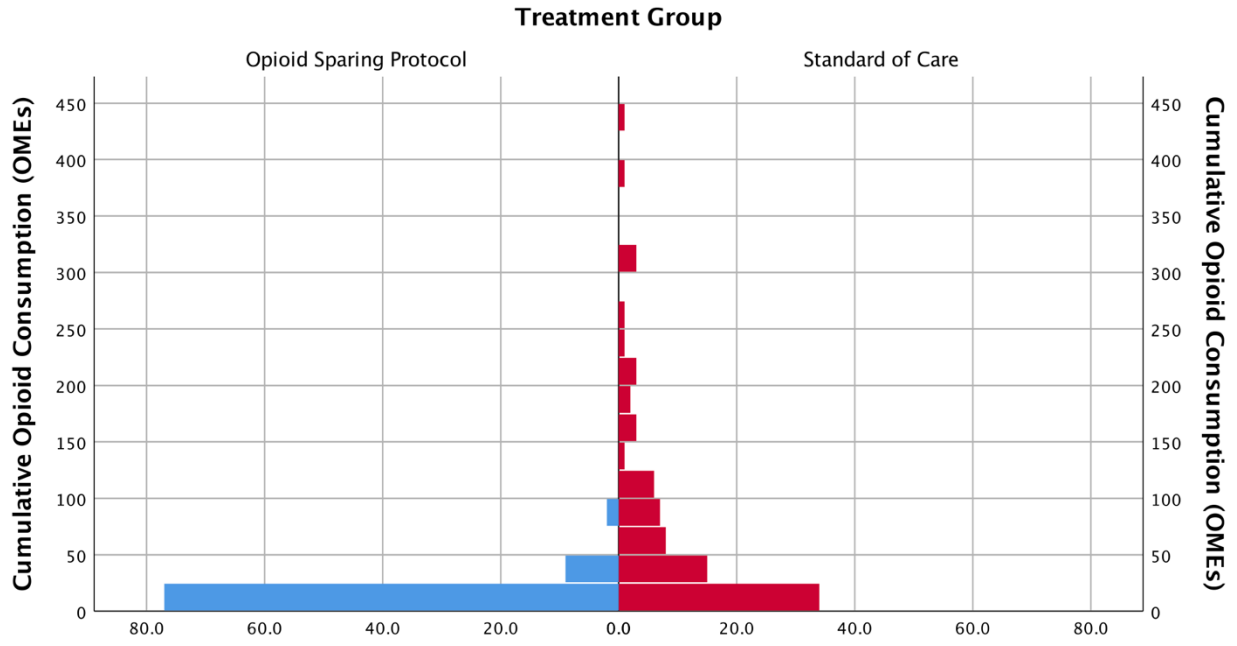

OME = oral morphine equivalents

**eFigure 3.** Mean daily pain scores (VAS) over the first 14 days by group

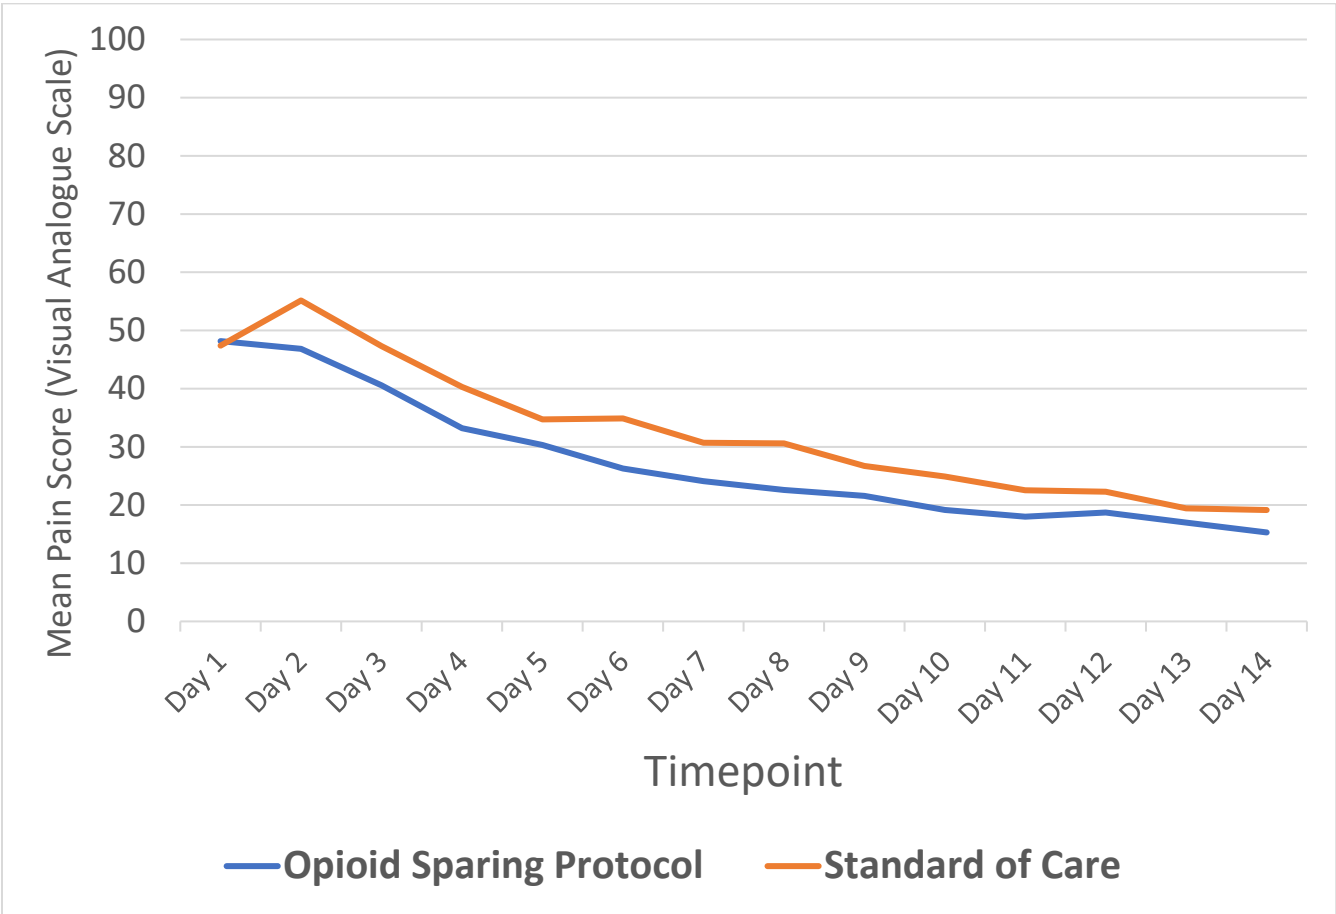

eFigure4 – Primary outcome with subgroup analyses

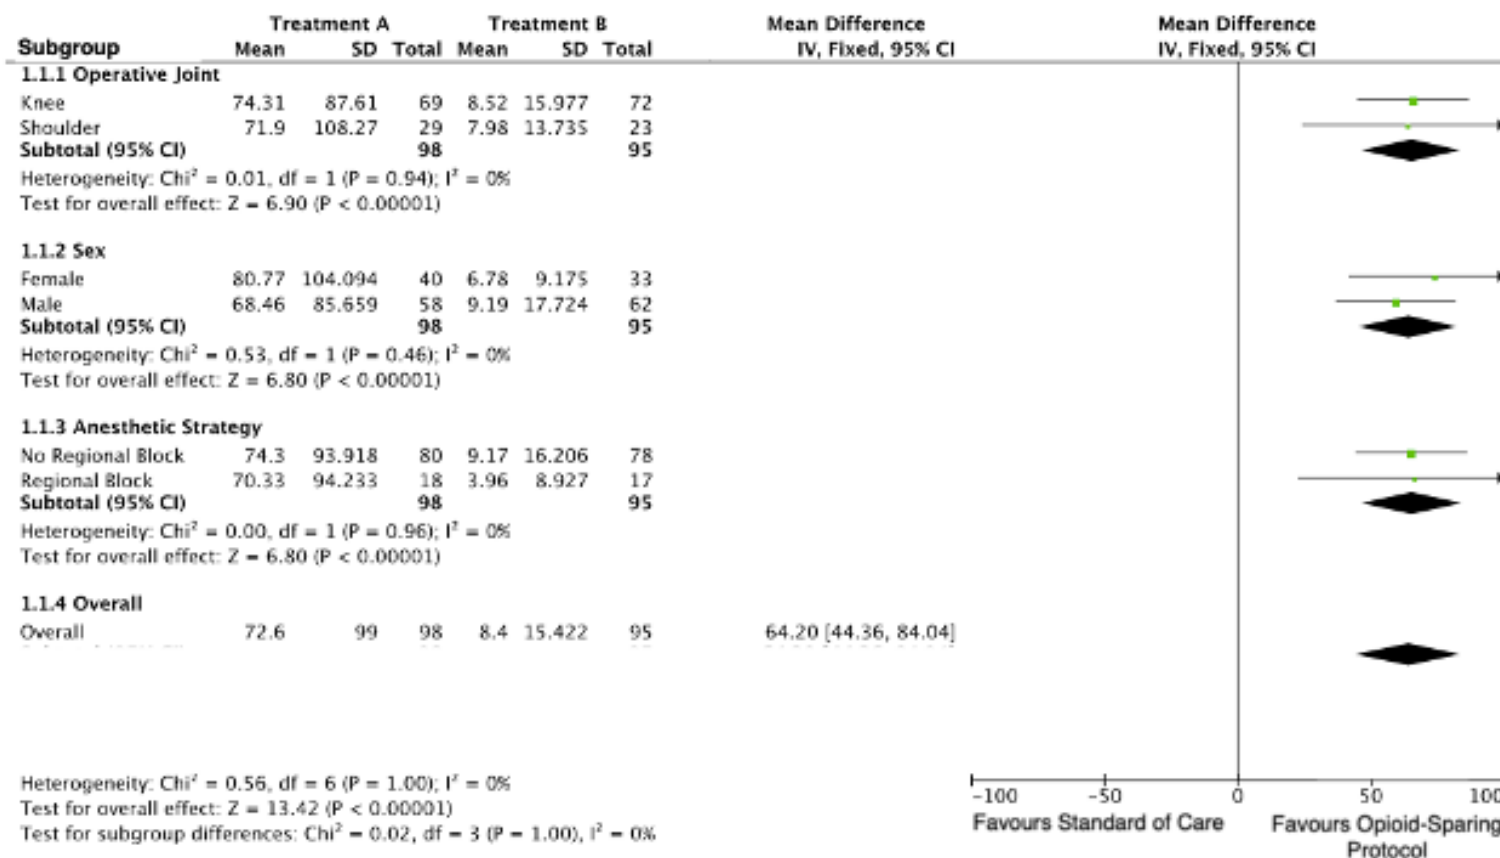

**Sensitivity Analysis**

The primary outcome analysis (cumulative opioid consumption at 6 weeks) was repeated without the use of imputed data, and the result was unchanged. The mean rank in the standard of care group was 112, compared to 63.6 in the opioid-sparing group. The Mann-Whitney U test demonstrated significantly higher opioid consumption in the standard of care group ( $Z = -6.55, P < .001$ )

**Post-Hoc Analyses**

The impact of the participating centre and surgical procedure on the primary outcome were analyzed in post-hoc models. These analyses were performed using mixed effects modeling with centre, knee procedure, and shoulder procedure as random models, respectively. The amount of variance accounted for by centre (0.02%), knee procedure (0.19%), and shoulder procedure (0.63%) was minimal. The inclusion of each of the above variables as an interaction term in the models was not significant, with Z-values of 0.65 (centre), 1.20 (knee procedure), and 1.53 (shoulder procedure) ( $p > 0.05$  for all).

**eTable3a - Patient Satisfaction at 2 weeks**

|           |                         |                | Always | Usually | Sometimes |
|-----------|-------------------------|----------------|--------|---------|-----------|
| Treatment | Standard of Care        | Count          | 45     | 35      | 13        |
|           |                         | % within Group | 45.9%  | 35.7%   | 13.3%     |
|           | Opioid Sparing Protocol | Count          | 57     | 26      | 9         |
|           |                         | % within Group | 60.0%  | 27.4%   | 9.5%      |

**eTable3b – Chi-square test of patient satisfaction at 2 weeks**

|                    | Value              | df | Asymptotic Significance (2-sided) |
|--------------------|--------------------|----|-----------------------------------|
| Pearson Chi-Square | 4.564 <sup>a</sup> | 4  | .335                              |
| Likelihood Ratio   | 4.962              | 4  | .291                              |
| N of Valid Cases   | 193                |    |                                   |



**eTable4a - Patient Satisfaction at 6 weeks**

|                         |                  |                | Always | Usually | Sometimes | Never |
|-------------------------|------------------|----------------|--------|---------|-----------|-------|
| Treatment               | Standard of Care | Count          | 48     | 31      | 10        | 1     |
|                         |                  | % within Group | 49.0%  | 31.6%   | 10.2%     | 1.0%  |
| Opioid Sparing Protocol |                  | Count          | 54     | 27      | 6         | 1     |
|                         |                  | % within Group | 56.8%  | 28.4%   | 6.3%      | 1.1%  |

**eTable4b – Chi-square test of patient satisfaction at 6 weeks**

|                    | Value              | df | Asymptotic Significance (2-sided) |
|--------------------|--------------------|----|-----------------------------------|
| Pearson Chi-Square | 2.249 <sup>a</sup> | 5  | .814                              |
| Likelihood Ratio   | 2.268              | 5  | .811                              |
| N of Valid Cases   | 193                |    |                                   |
