# Supplementary material
Source: PubMed Central journal article supplement (PMC9533185)
Supplement: jama-e2216844-s004.pdf [file jama-e2216844-s004.pdf]

\*First name, last name, and suffix (if applicable) are required and will appear in PubMed.

| <b>*Group Name(s): NO PAin Investigators</b> |                   |                              |                     |                                  |                                          |                                                                                                             |                                                                                            |  |  |  |  |  |  |  |  |  |  |  |  |
|----------------------------------------------|-------------------|------------------------------|---------------------|----------------------------------|------------------------------------------|-------------------------------------------------------------------------------------------------------------|--------------------------------------------------------------------------------------------|--|--|--|--|--|--|--|--|--|--|--|--|
| <b>*First Name and Middle Initial(s)</b>     | <b>*Last Name</b> | <b>*Suffix (eg, Jr, III)</b> | Academic Degrees    | Institution                      | Location (city, state/province, country) | Role or Contribution, eg, chair, principal investigator                                                     | Group (if more than 1 Group listed in the byline) and/or Subgroup (eg, Steering Committee) |  |  |  |  |  |  |  |  |  |  |  |  |
| Andrew                                       | Duong             |                              | MSc                 | McMaster University              | Hamilton, Ontario, Canada                | Project Management, Site Research Personnel (McMaster University Medical Centre, Hamilton General Hospital) |                                                                                            |  |  |  |  |  |  |  |  |  |  |  |  |
| Andrea K.                                    | Ponniah           |                              | BSc                 | McMaster University              | Hamilton, Ontario, Canada                | Project Management, Site Research Personnel (McMaster University Medical Centre, Hamilton General Hospital) |                                                                                            |  |  |  |  |  |  |  |  |  |  |  |  |
| Caitlin                                      | VanDeCapelle      |                              | MD, FRCPC           | Hamilton Health Sciences         | Hamilton, Ontario, Canada                | Steering Committee                                                                                          |                                                                                            |  |  |  |  |  |  |  |  |  |  |  |  |
| Franca                                       | Mossuto           |                              | RN                  | Hamilton Health Sciences         | Hamilton, Ontario, Canada                | Steering Committee                                                                                          |                                                                                            |  |  |  |  |  |  |  |  |  |  |  |  |
| Eric                                         | Romeril           |                              | RPh, ACPR, BScPharm | Hamilton Health Sciences         | Hamilton, Ontario, Canada                | Steering Committee                                                                                          |                                                                                            |  |  |  |  |  |  |  |  |  |  |  |  |
| Steve                                        | Phillips          |                              | MSc                 | Fergus                           | Fergus, Ontario, Canada                  | Steering Committee (ON-Patient Advisor)                                                                     |                                                                                            |  |  |  |  |  |  |  |  |  |  |  |  |
| Herman                                       | Johal             |                              | MD, MPH, FRCSC      | McMaster University              | Hamilton, Ontario, Canada                | Adjudication Committee Chair                                                                                |                                                                                            |  |  |  |  |  |  |  |  |  |  |  |  |
| Jamal                                        | Al-Asiri          |                              | MD, FRCSC           | McMaster University              | Hamilton, Ontario, Canada                | Adjudication Committee                                                                                      |                                                                                            |  |  |  |  |  |  |  |  |  |  |  |  |
| Daniel                                       | Tushinski         |                              | MD, FRCSC           | McMaster University              | Hamilton, Ontario, Canada                | Adjudication Committee                                                                                      |                                                                                            |  |  |  |  |  |  |  |  |  |  |  |  |
| Thomas J.                                    | Wood              |                              | MD, MSc, FRCSC      | McMaster University              | Hamilton, Ontario, Canada                | Medical Monitor                                                                                             |                                                                                            |  |  |  |  |  |  |  |  |  |  |  |  |
| Devin                                        | Peterson          |                              | MD, FRCSC           | McMaster University              | Hamilton, Ontario, Canada                | Site Research Personnel (McMaster University Medical Centre)                                                |                                                                                            |  |  |  |  |  |  |  |  |  |  |  |  |
| Matthew                                      | Denkers           |                              | MD, FRCSC           | Hamilton General Hospital        | Hamilton, Ontario, Canada                | Site Research Personnel (Hamilton General Hospital)                                                         |                                                                                            |  |  |  |  |  |  |  |  |  |  |  |  |
| Anthony                                      | Adili             |                              | MD, FRCSC           | St. Joseph's Healthcare Hamilton | Hamilton, Ontario, Canada                | Site Research Personnel (St. Joseph's Healthcare Hamilton)                                                  |                                                                                            |  |  |  |  |  |  |  |  |  |  |  |  |
| Vickas                                       | Khanna            |                              | MD, FRCSC, MHA      | St. Joseph's Healthcare Hamilton | Hamilton, Ontario, Canada                | Site Research Personnel (St. Joseph's Healthcare Hamilton)                                                  |                                                                                            |  |  |  |  |  |  |  |  |  |  |  |  |
| Jaydeep                                      | Moro              |                              | MD, FRCSC           | St. Joseph's Healthcare Hamilton | Hamilton, Ontario, Canada                | Site Research Personnel (St. Joseph's Healthcare Hamilton)                                                  |                                                                                            |  |  |  |  |  |  |  |  |  |  |  |  |
| Imad                                         | Kashir            |                              | BSc                 | St. Joseph's Healthcare Hamilton | Hamilton, Ontario, Canada                | Site Research Personnel (St. Joseph's Healthcare Hamilton)                                                  |                                                                                            |  |  |  |  |  |  |  |  |  |  |  |  |

Supplemental Online Content: Nonauthor Collaborators

\*First name, last name, and suffix (if applicable) are required and will appear in PubMed.

| *First Name and Middle Initial(s) | *Last Name  | *Suffix (eg, Jr, III) | Academic Degrees | Institution                      | Location (city, state/province, country) | Role or Contribution, eg, chair, principal investigator    | Group (if more than 1 Group listed in the byline) and/or Subgroup (eg, Steering Committee) |  |  |  |  |  |  |  |  |
|-----------------------------------|-------------|-----------------------|------------------|----------------------------------|------------------------------------------|------------------------------------------------------------|--------------------------------------------------------------------------------------------|--|--|--|--|--|--|--|--|
| Grace                             | Mwakijele   |                       | BPH              | St. Joseph's Healthcare Hamilton | Hamilton, Ontario, Canada                | Site Research Personnel (St. Joseph's Healthcare Hamilton) |                                                                                            |  |  |  |  |  |  |  |  |
| Darren                            | Young Shing |                       | BHSc             | St. Joseph's Healthcare Hamilton | Hamilton, Ontario, Canada                | Site Research Personnel (St. Joseph's Healthcare Hamilton) |                                                                                            |  |  |  |  |  |  |  |  |
